# Supplementary material
Source: publisher figshare collection journal article supplement (https://tandf.figshare.com/ndownloader/files/15657842)
Supplement: Supplementary file 1 [file 15657842]

**Supporting information for**

**Enhanced photovoltaic performances of C219-based dye sensitizers by introducing electron-withdrawing substituents: a density functional theory study**

**Caibin Zhaoa[[1]](#footnote-2),** **Qiang Zhanga, Xiaohu Yua*,** **Ke Zhoua, Lingxia Jina* and Wenliang Wangb**

aShaanxi Key Laboratory of Catalysis, School of Chemical and Environmental Science, Shaanxi University of Technology, Hanzhong, Shaanxi 723001, P. R. China

bKey Laboratory for Macromolecular Science of Shaanxi Province, School of Chemistry and Chemical Engineering, Shaanxi Normal University, Xi’an, Shaanxi 710062, P. R. China

**[[2]](#footnote-3)Contents**

**Table S1** Calculated excited energies for the C219 dye with different TD-DFT methods

**Figure S1** Simulated and experimental UV-vis absorption spectra for the C219 dye with the TD-CAM-B3LYP/6-31G(d) method

**Table S2** Calculated frontier molecular orbital levels for the C219 dye with different DFT methods

**Table S3** Calculated frontier molecular orbital levels for the C219 dye with the optimized CAM-B3LYP/6-31G(d) method

**Table S4** Optimized main dihedral angles between adjacent units in all studied dyes with the B3LYP/6-31G(d) method

**Figure S2** Optimized geometries for 1/(TiO2)38, 3/(TiO2)38, 5/(TiO2)38, and 7/(TiO2)38 complexes

**Figure S3** Optimized slant angles for all studied dye/(TiO2)38 complexes

**Table S5** Optimized Ti-O bond lengths for all studied dye/(TiO2)38 complexes

**Table S6** Calculated hole-electron distances (Dhe) and hole-electron overlaps (Ohe) for all studied dyes in the S1 state

**Figure S4** Calculated HOMO and LUMO profiles with Isovalue=0.04(left: HOMOs, right: LUMOs)

**Figure S5** Schematic diagram of the distance from the HOMO/LUMO center to the TiO2 surface (d1 represents the distance from the HOMO center to the TiO2 surface, and d2 represents the distance from the LUMO center to the TiO2 surface)

description process of in cus equation

**Calculation details of the relevant parameters in Marcus model**

**Table S1**

| Functional/Basis | *λ*max/nm | Δ*λ*max/nm*b* |
| --- | --- | --- |
| B3LYP/6-311G(d,p) | 646.7 | 153.7 |
| B3PW91/6-311G(d,p) | 645.2 | 152.2 |
| CAM-B3LYP/6-311G(d,p) | 497.7 | 4.7 |
| **CAM-B3LYP/6-31G(d)** | **494.6** | **1.6** |
| M062X/6-311G(d,p) | 499.7 | 6.7 |
| MPW1PW91/6-311G(d,p) | 750.8 | 257.8 |
| PBEPBE/6-311G(d,p) | 911.5 | 418.5 |
| TPSSTPSS/6-311G(d,p) | 883.3 | 390.3 |
| wB97XD/6-311G(d,p) | 480.8 | -12.2 |
| Exp.t | 493.0*a* | / |

*a* From the reference [12]. *b* Δ*λ*max=*λ*max(Cal.)- *λ*max(Exp.)


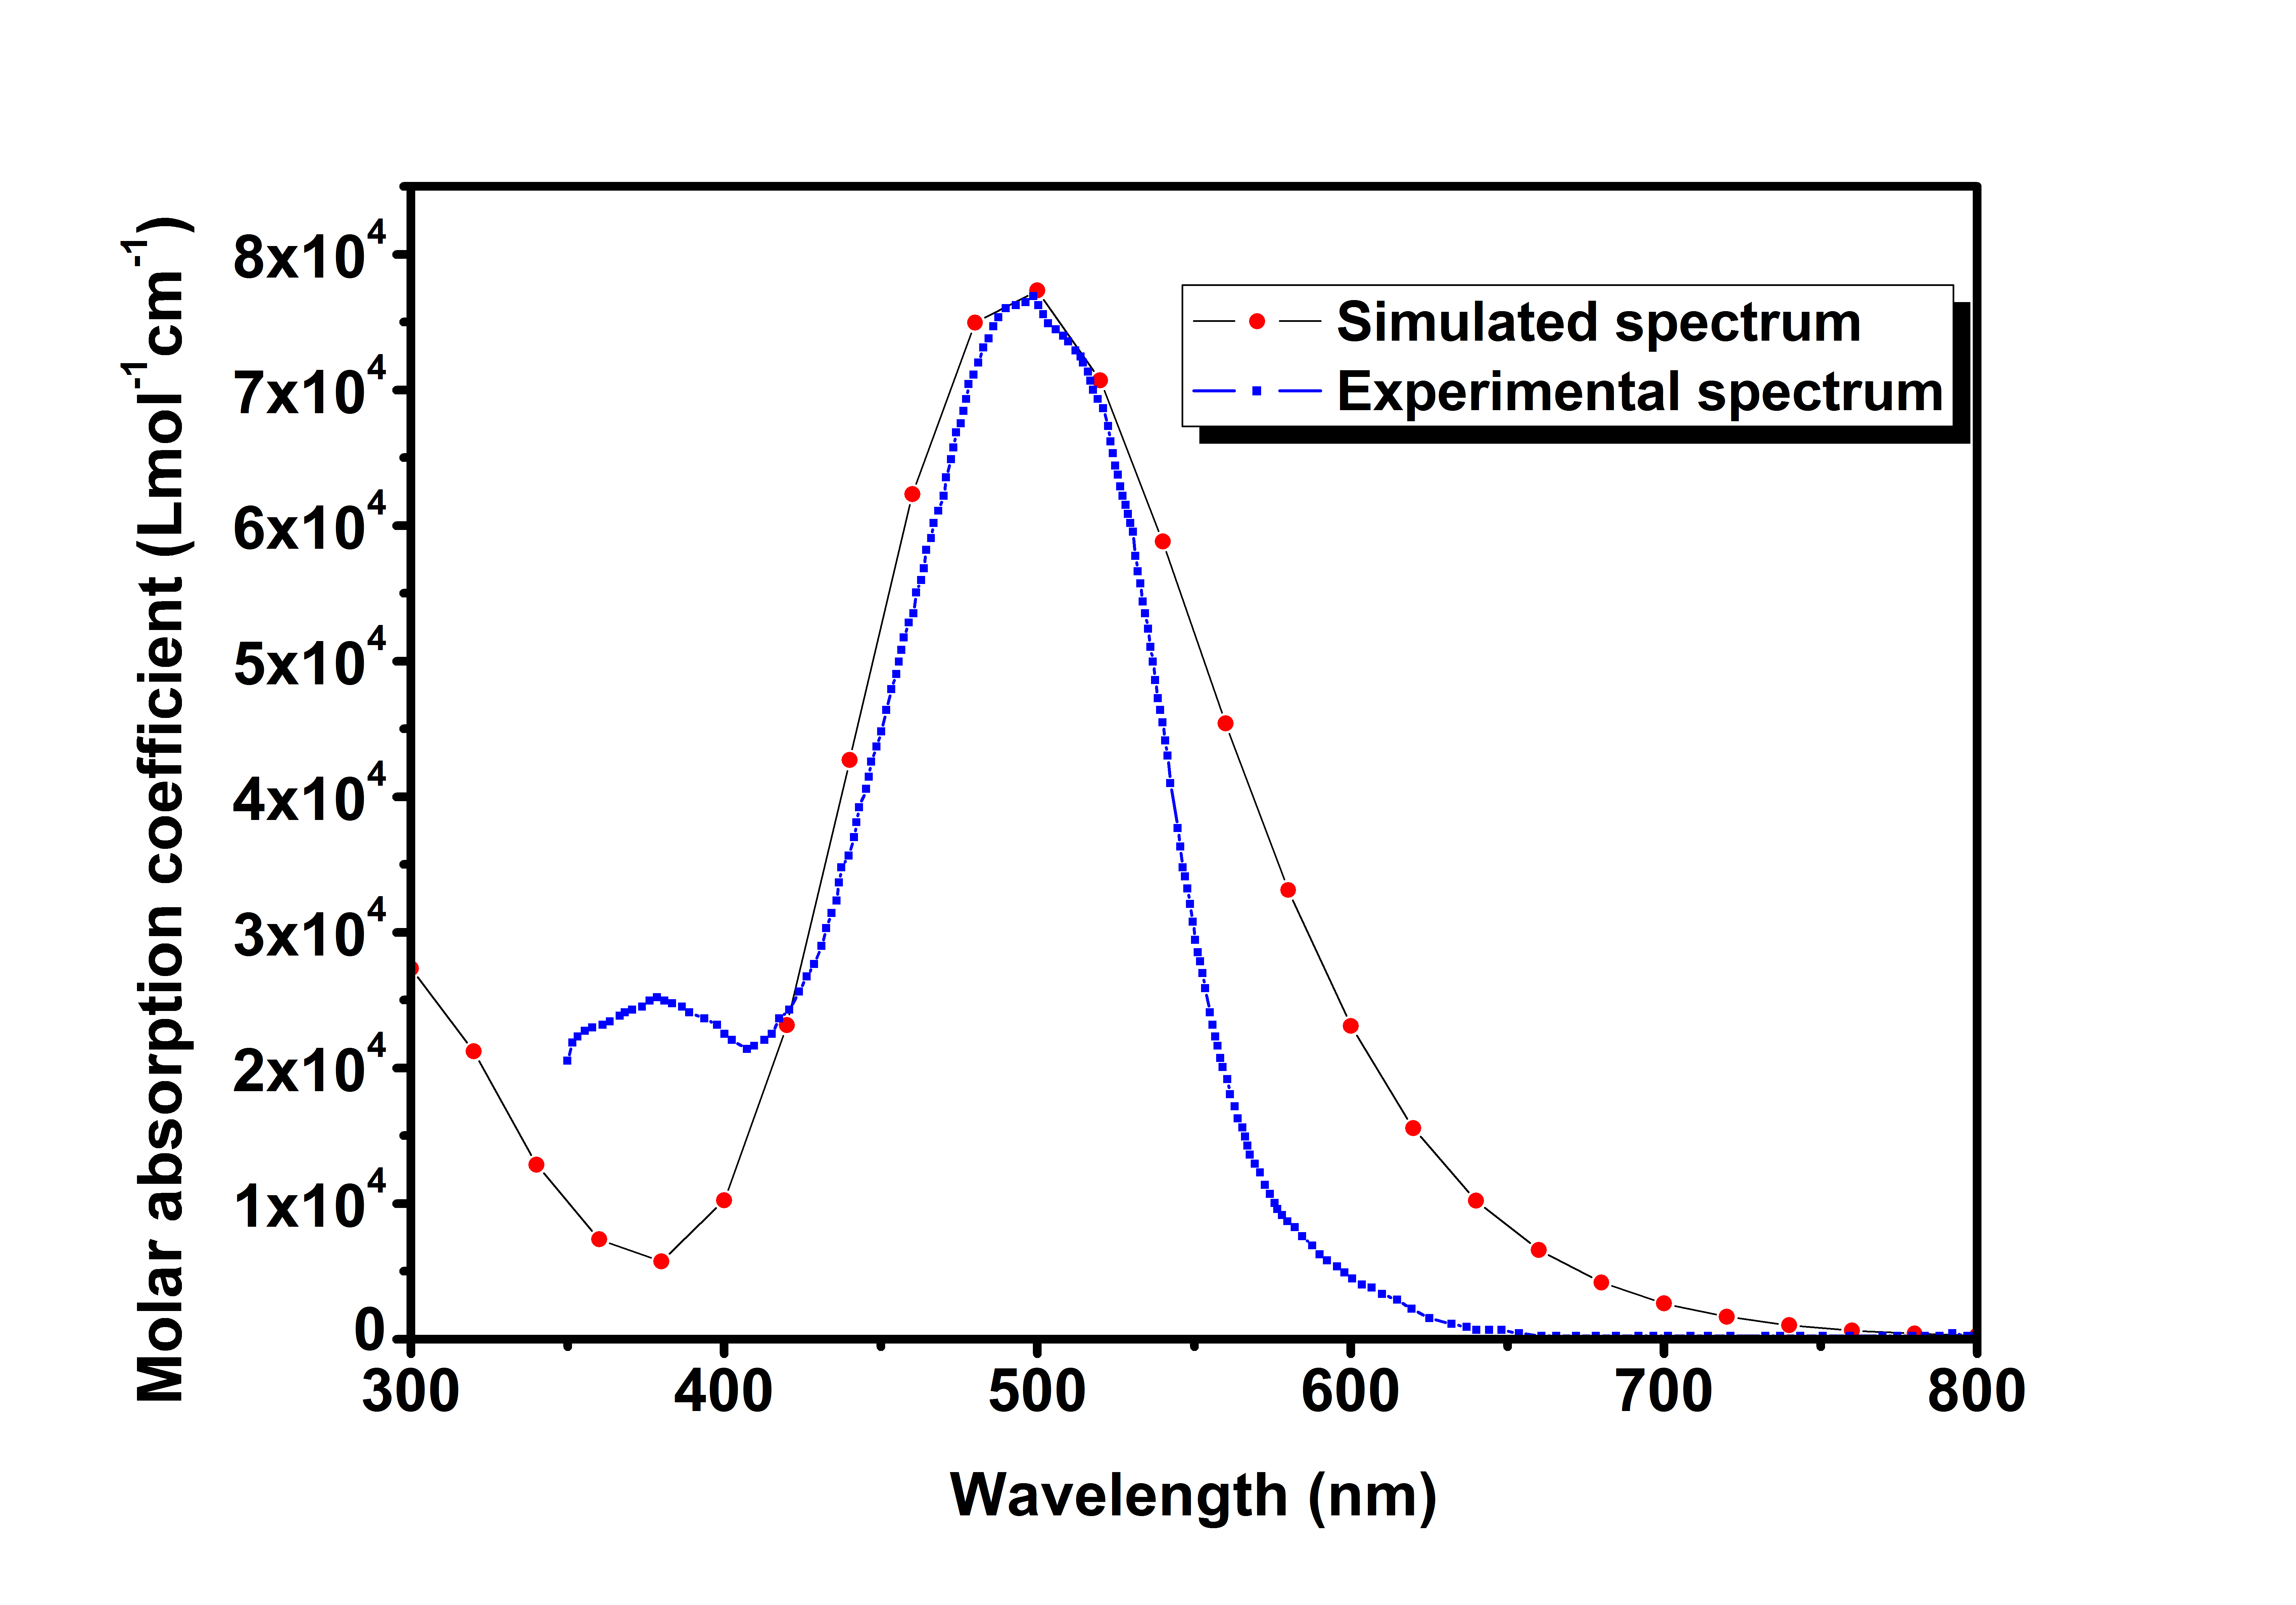


**Figure S1**

**Table S2**

| Scheme | Calculated value | | | Deviation *b* | | |
| --- | --- | --- | --- | --- | --- | --- |
| EHOMO | ELUMO | Egap | △EHOMO | △ELUMO | △Egap |
| B3LYP/6-31G(d) | -4.875 | -2.765 | 2.110 | 0.085 | 0.705 | 0.62 |
| B3PW91/6-31G(d) | -4.816 | -2.904 | 1.912 | 0.144 | 0.566 | 0.422 |
| CAM-B3PW91/6-31G(d) | -5.830 | -1.840 | 3.990 | -0.870 | 1.630 | 2.500 |
| LC-wPBE/6-31G(d) | -7.034 | -1.167 | 5.867 | -2.074 | 2.303 | 4.377 |
| M062X/6-31G(d) | -5.833 | -2.204 | 3.629 | -0.873 | 1.266 | 2.139 |
| PBEPBE/6-31G(d) | -4.118 | -3.162 | 0.956 | 0.842 | 0.308 | -0.534 |
| MPW1PW91/6-31G(d) | -4.967 | -2.796 | 2.171 | -0.007 | 0.674 | 0.681 |
| TPSSTPSS/6-31G(d) | -4.109 | -3.110 | 0.999 | 0.851 | 6.58 | -0.491 |
| wb97XD/6-31G(d) | -6.413 | -1.357 | 5.056 | -1.453 | 2.113 | 3.566 |
| Experimental FMO level*a* | -4.960 | -3.470 | 1.490 |  |  |  |

*a* From reference [12].

*b*△EHOMO= EHOMO(Exp.)- EHOMO(Cal.), △ELUMO= ELUMO(Exp.)- ELUMO(Cal.), △Egap= Egap(Exp.)- Egap(Cal.).

**Table S3**

**EXP=P2EXHF + P1(P4EXSlater + P3ΔExnon-local) + P6EClocal + P5ΔECnon-local**

| Scheme | Calculated value | | | Deviation value *b* | | |
| --- | --- | --- | --- | --- | --- | --- |
| EHOMO | ELUMO | Egap | △EHOMO | △ELUMO | △Egap |
| 1 | -5.830 | -1.840 | 3.990 | 0.870 | -1.630 | -2.500 |
| 2 | -5.106 | -3.073 | 2.033 | 0.146 | -0.397 | -0.543 |
| 3 | -4.064 | -2.615 | 1.449 | -0.896 | -0.855 | 0.041 |
| 4 | -4.582 | -2.846 | 1.736 | -0.378 | -0.624 | -0.246 |
| 5 | -4.167 | -2.661 | 1.506 | -0.793 | -0.809 | -0.016 |
| 6 | -4.115 | -2.638 | 1.477 | -0.845 | -0.832 | 0.013 |
| 7 | -5.553 | -4.063 | 1.490 | 0.593 | 0.593 | 0.000 |
| 8 | -4.868 | -3.384 | 1.484 | -0.092 | -0.086 | 0.006 |
| 9 | -5.005 | -3.520 | 1.485 | 0.045 | 0.050 | 0.005 |
| **10** | **-4.936** | **-3.452** | **1.484** | **-0.024** | **-0.018** | **0.006** |
| **Exp.***a* | -4.96 | -3.47 | 1.49 | / | / | / |

*a* From reference [12].

*b*△EHOMO= EHOMO(Exp.)- EHOMO(Cal.), △ELUMO= ELUMO(Exp.)- ELUMO(Cal.), △Egap= Egap(Exp.)- Egap(Cal.).

1. P1=1.00, P2=0.19, P3=0.65, P4=0.81, P5=0.65, P6=0.35. 2. P1=0.80, P2=0.40, P3=0.65, P4=0.81, P5=0.65, P6=3.45.

3. P1=0.80, P2=0.20, P3=0.65, P4=0.81, P5=0.65, P6=3.45. 4. P1=0.80, P2=0.30, P3=0.65, P4=0.81, P5=0.65, P6=3.45

5. P1=0.80, P2=0.22, P3=0.65, P4=0.81, P5=0.65, P6=3.45. 6. P1=0.80, P2=0.21, P3=0.65, P4=0.81, P5=0.65, P6=3.45.

7. P1=0.80, P2=0.21, P3=0.65, P4=0.81, P5=0.00, P6=4.50. 8. P1=0.80, P2=0.21, P3=0.65, P4=0.81, P5=0.00, P6=4.00.

9. P1=0.80, P2=0.21, P3=0.65, P4=0.81, P5=0.00, P6=4.10. 10. P1=0.80, P2=0.21, P3=0.65, P4=0.81, P5=0.00, P6=4.05.

**Table S4**


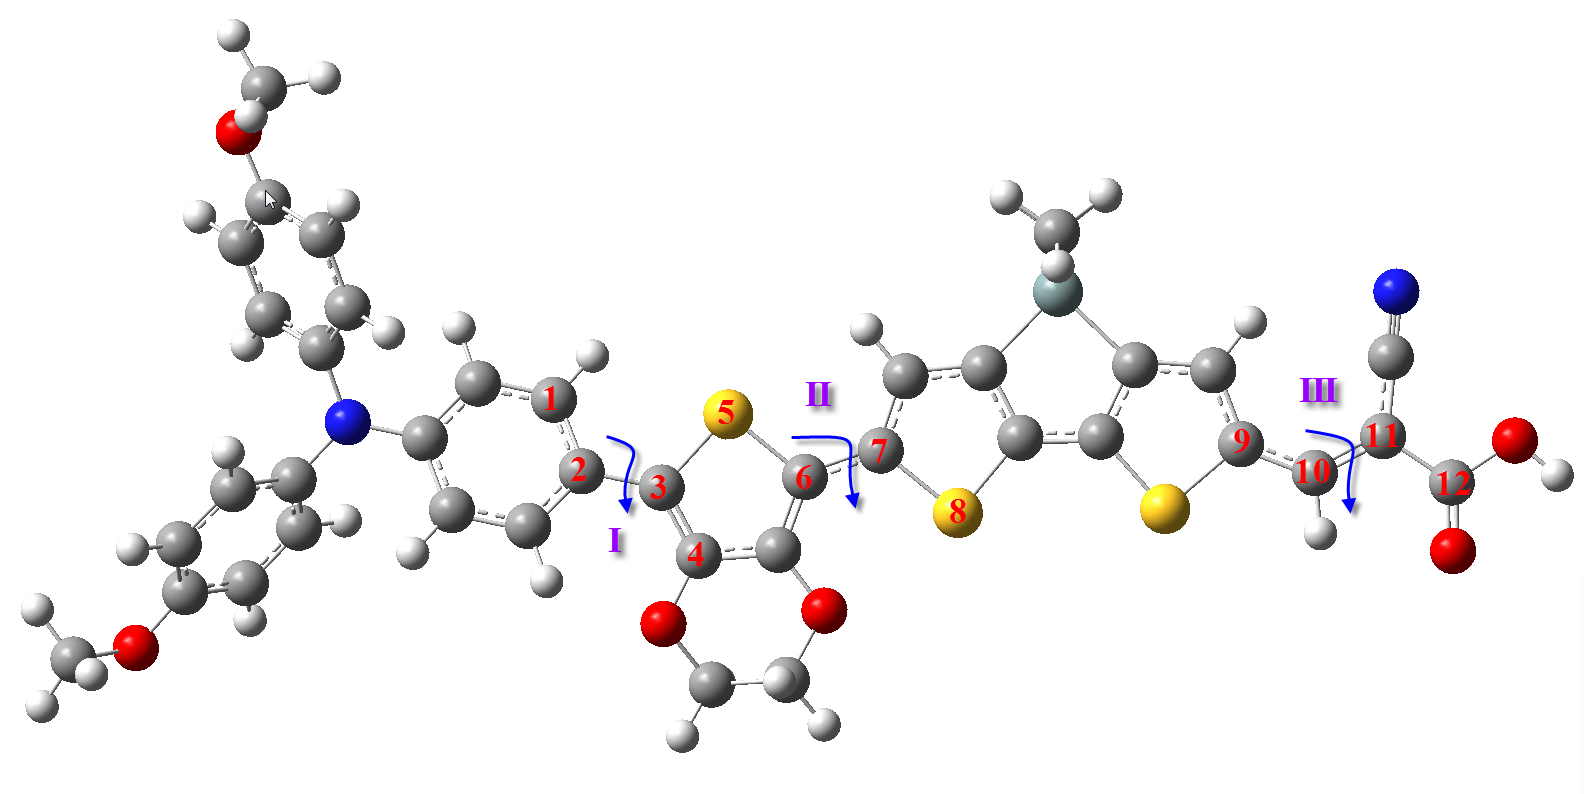


| Dye | I | II | III |
| --- | --- | --- | --- |
| C219 | 16.5 | 1.3 | 0.1 |
| 1 | 18.7 | 0.7 | 24.1 |
| 2 | 17.6 | 1.6 | 10.1 |
| 3 | 16.7 | 1.5 | 11.1 |
| 4 | 15.6 | 1.4 | 0.1 |
| 5 | 18.1 | 0.2 | 0.1 |
| 6 | 17.5 | 1.5 | 0.4 |
| 7 | 18.5 | 1.5 | 1.0 |


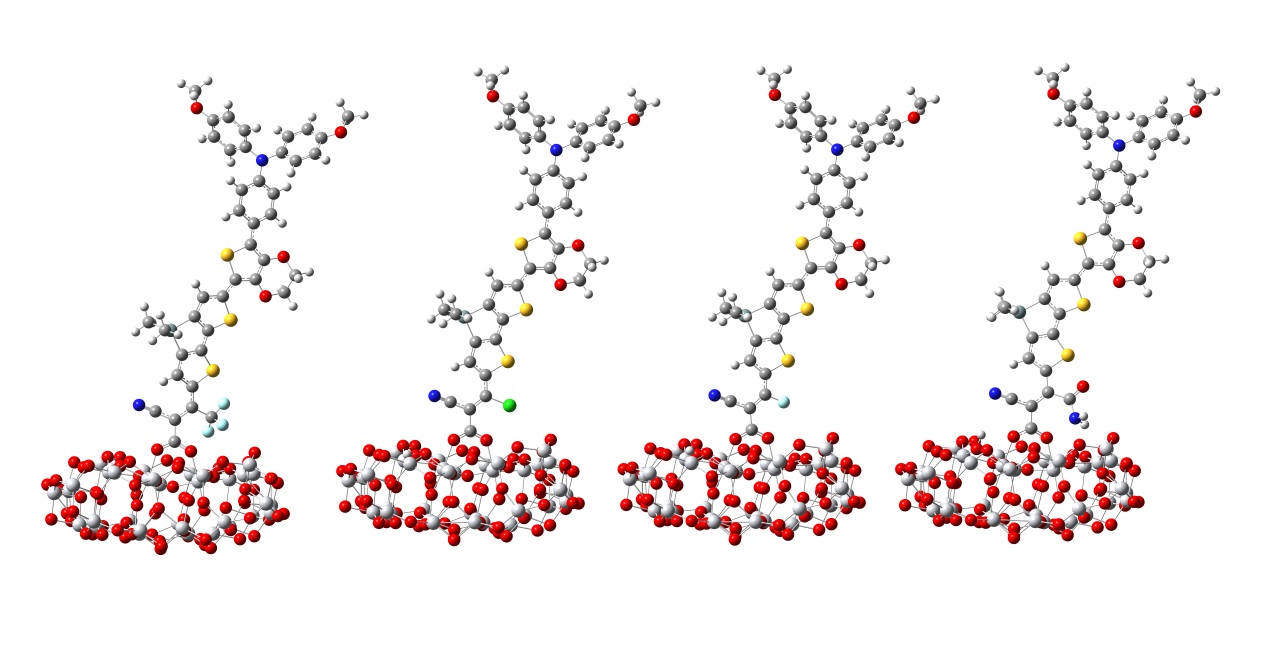


**Figure S2**


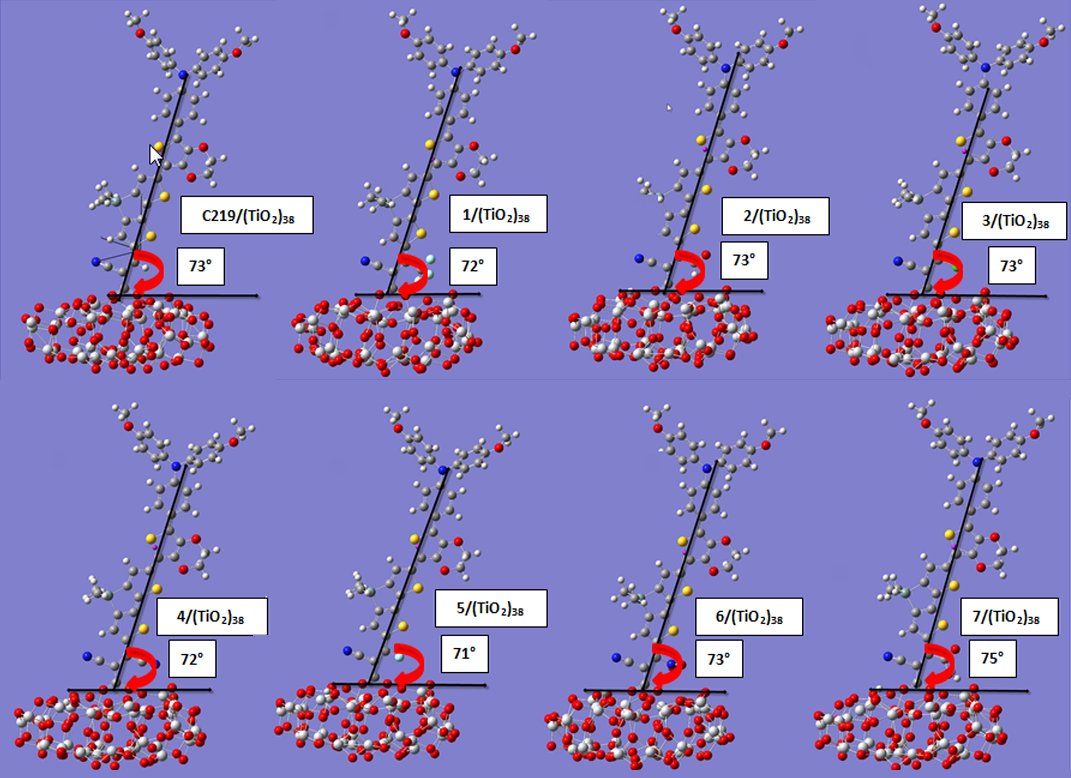


**Figure S3**

**Table S5**


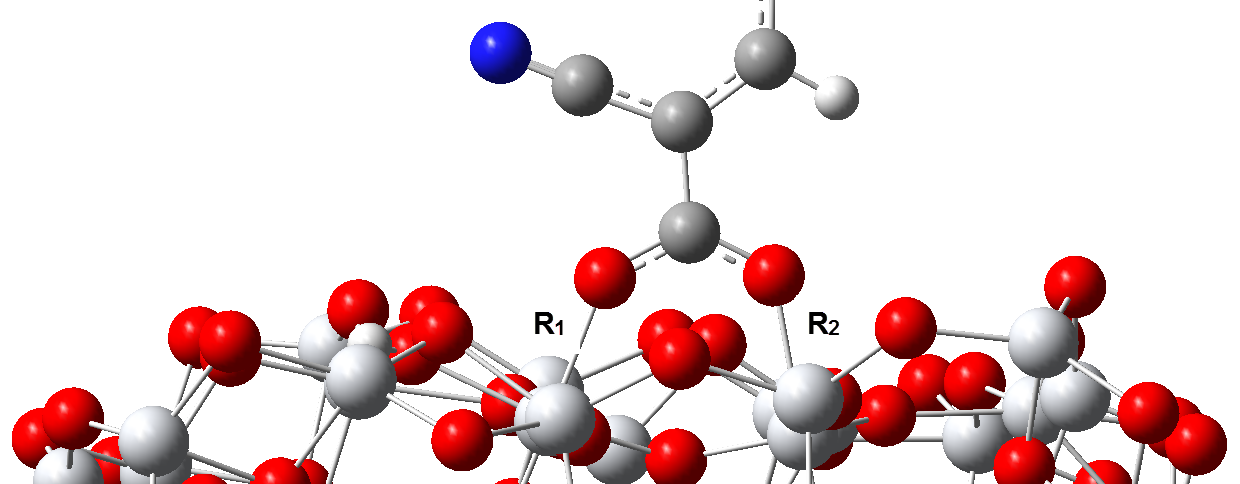


| Dye | R1/Å | R2/Å |
| --- | --- | --- |
| C219 | 2.037 | 2.156 |
| 1 | 2.075 | 2.077 |
| 2 | 2.102 | 2.173 |
| 3 | 2.063 | 2.074 |
| 4 | 2.053 | 2.103 |
| 5 | 2.032 | 2.112 |
| 6 | 2.076 | 2.126 |
| 7 | 2.087 | 2.199 |

Table S6 Calculated hole-electron distances (Dhe) and hole-electron overlaps (Ohe) for all studied dyes in the S1 state

| Dye | Dhe/Å | Ohe/Å |
| --- | --- | --- |
| C219 | 3.184 | 0.418 |
| 1 | 3.578 | 0.383 |
| 2 | 3.913 | 0.369 |
| 3 | 3.787 | 0.379 |
| 4 | 4.374 | 0.353 |
| 5 | 3.416 | 0.403 |
| 6 | 3.783 | 0.376 |
| 7 | 3.390 | 0.400 |


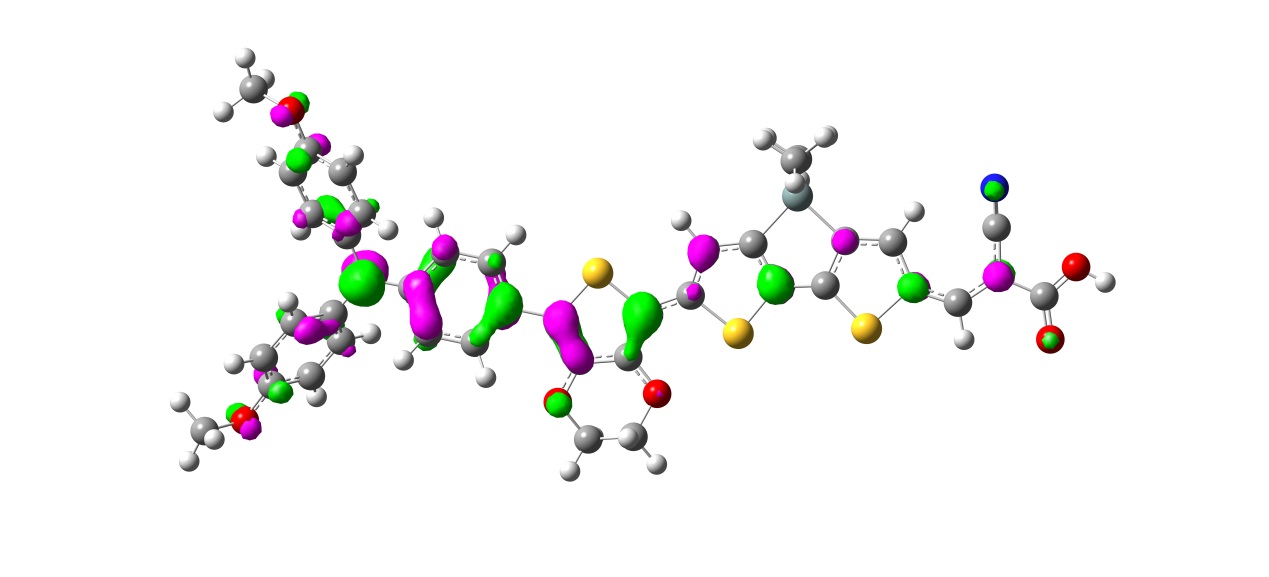

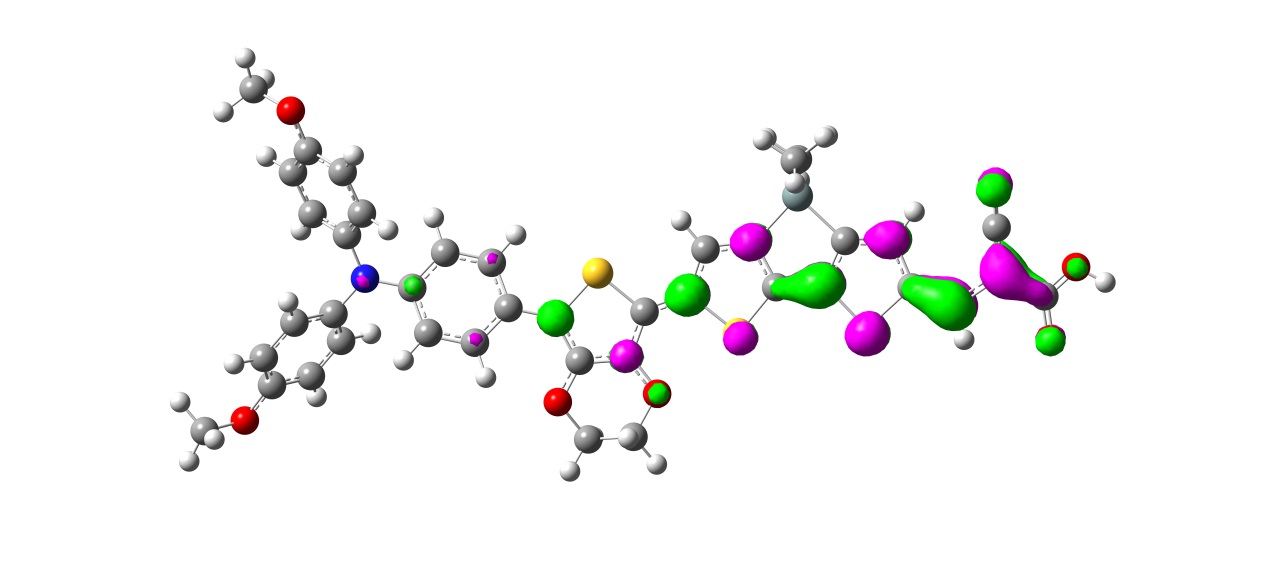


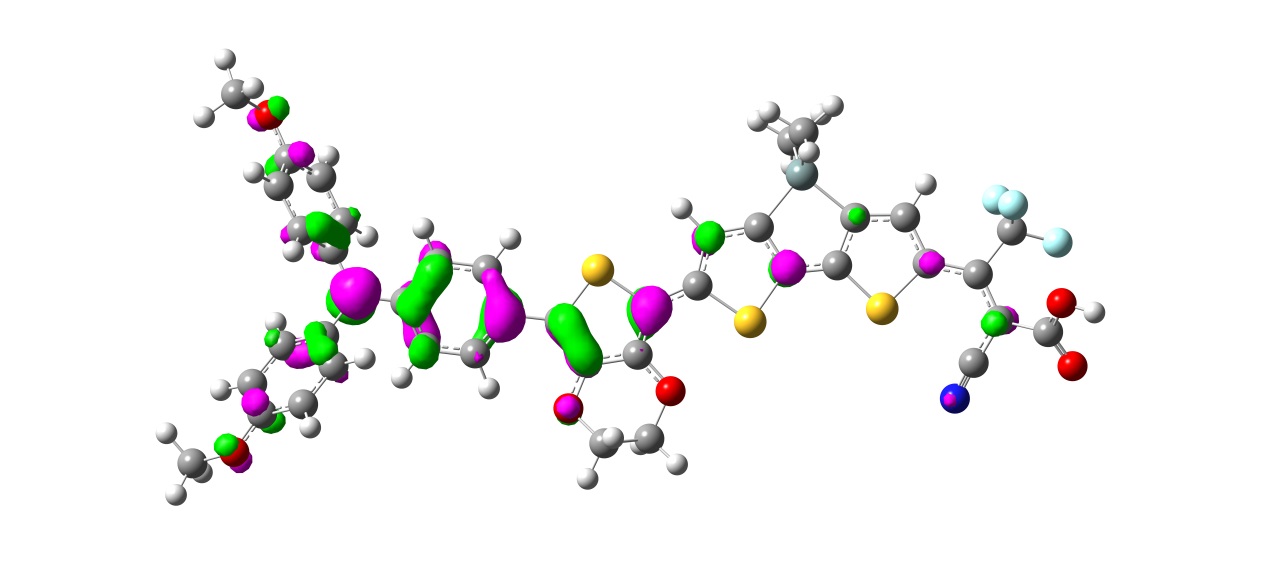

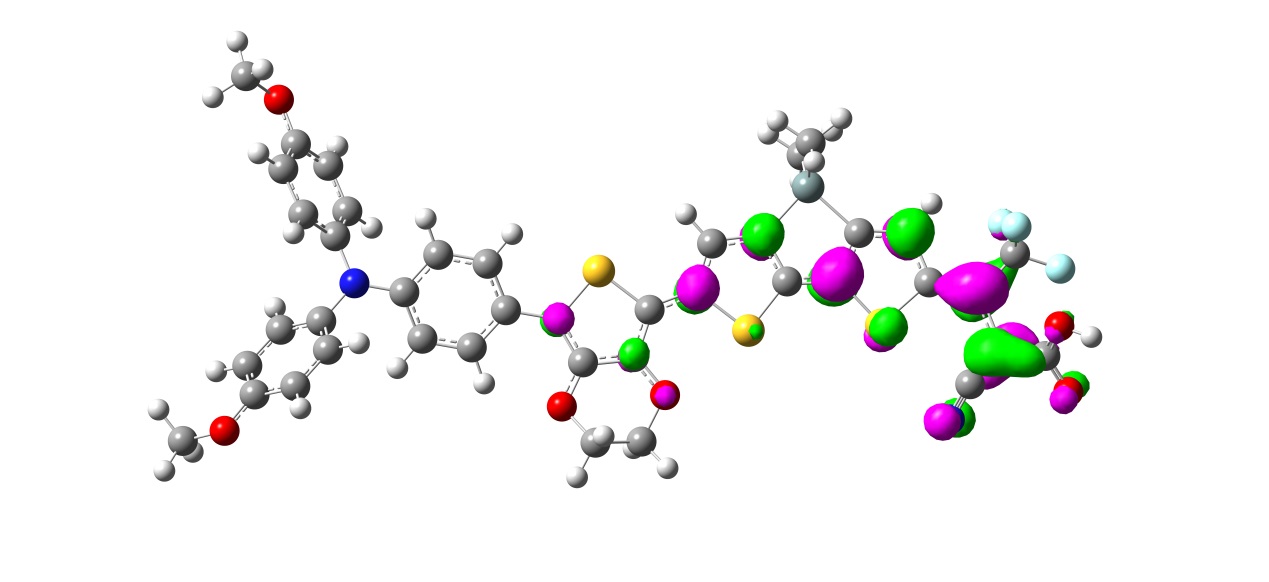


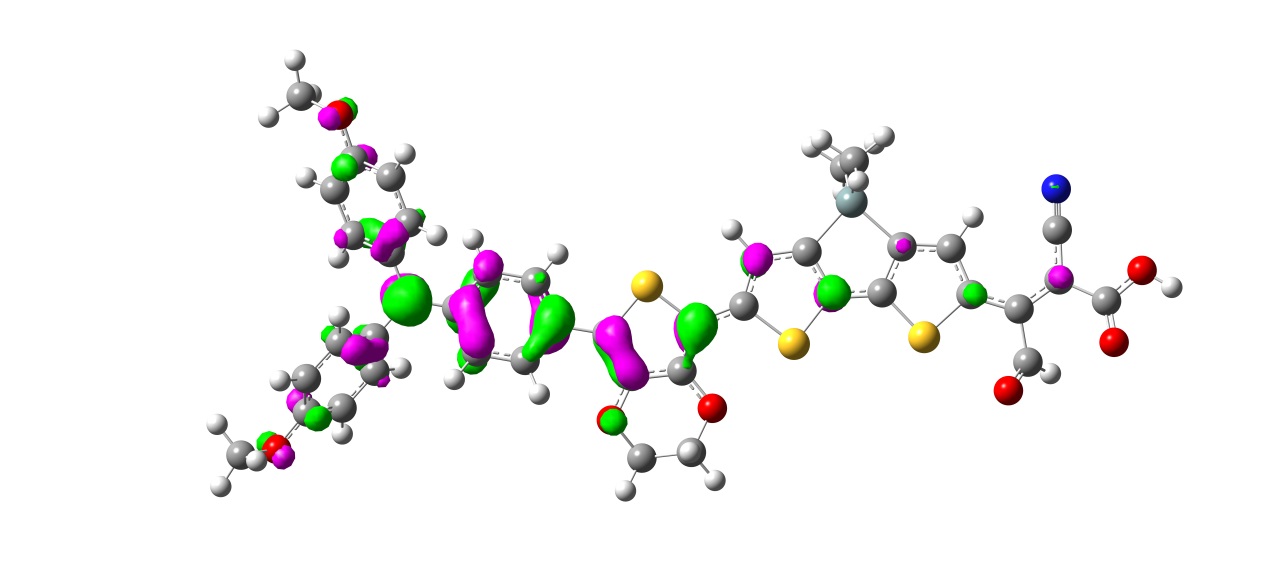

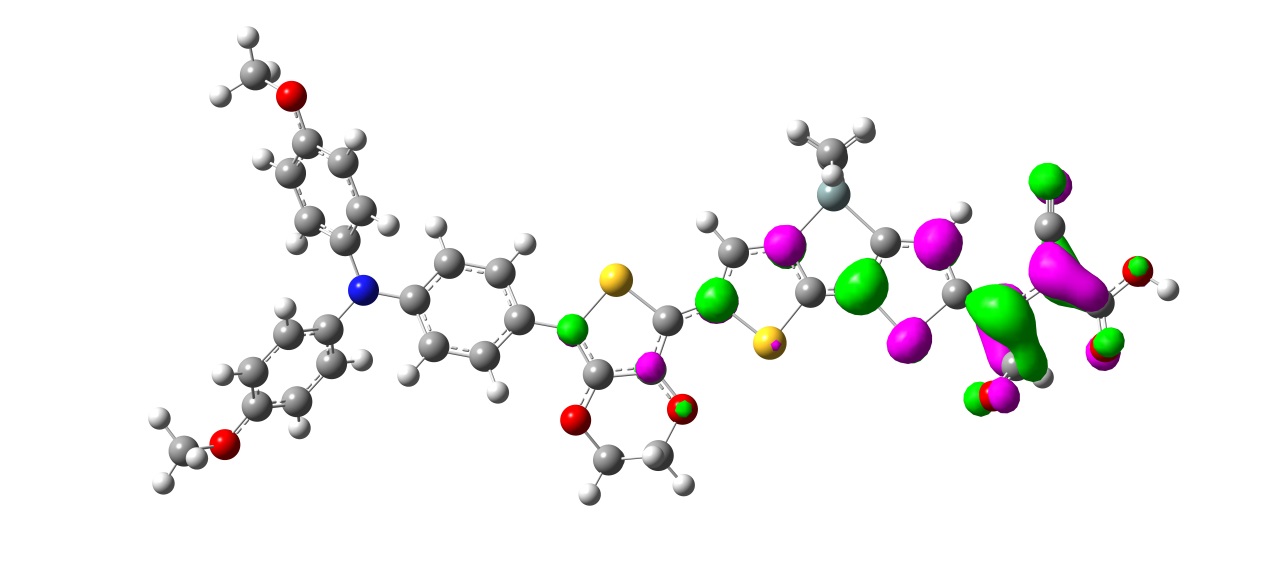


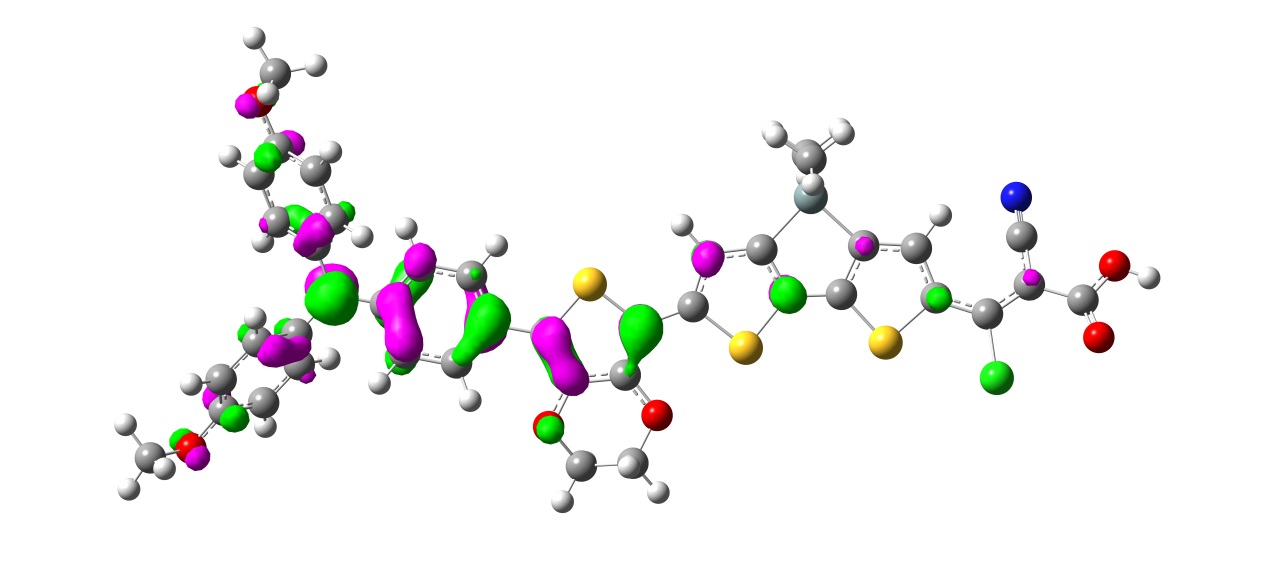

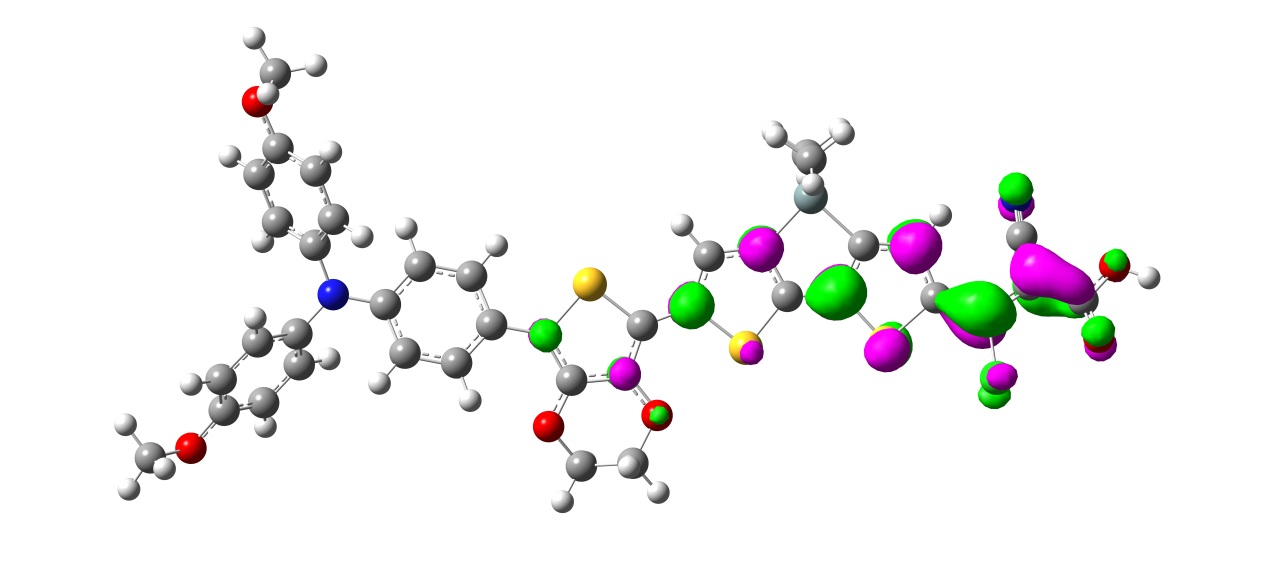


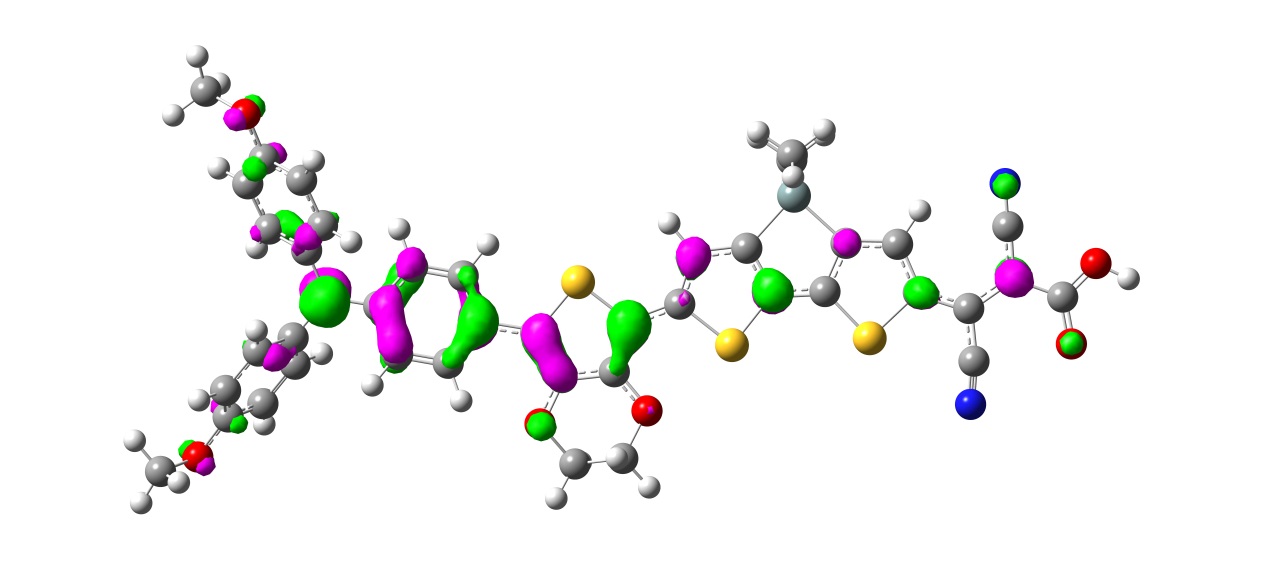

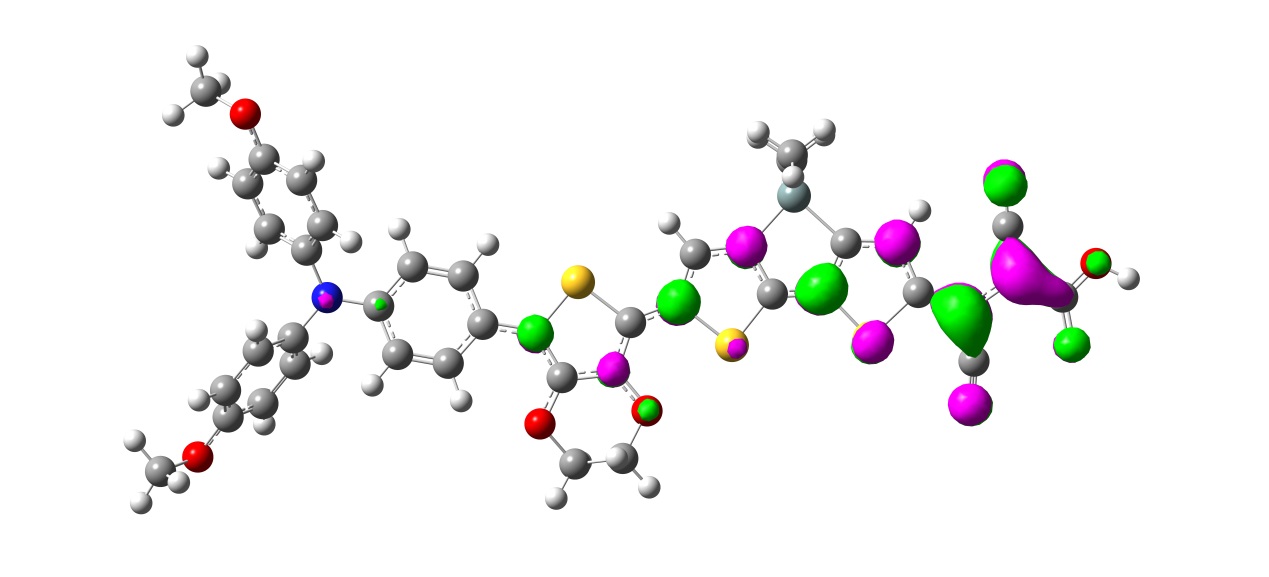


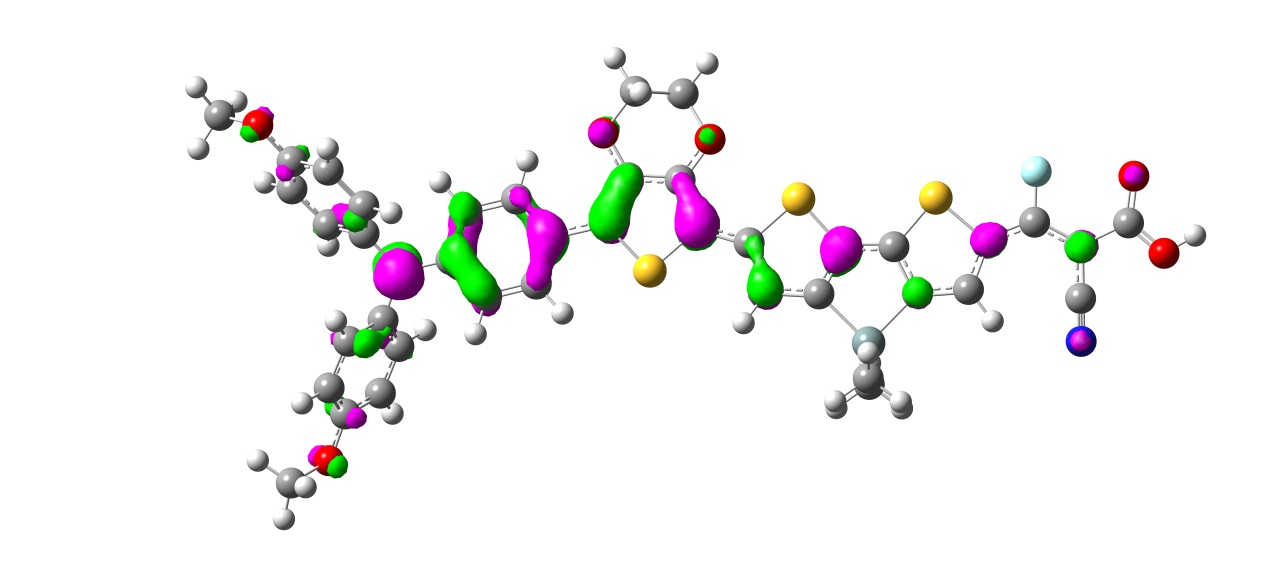

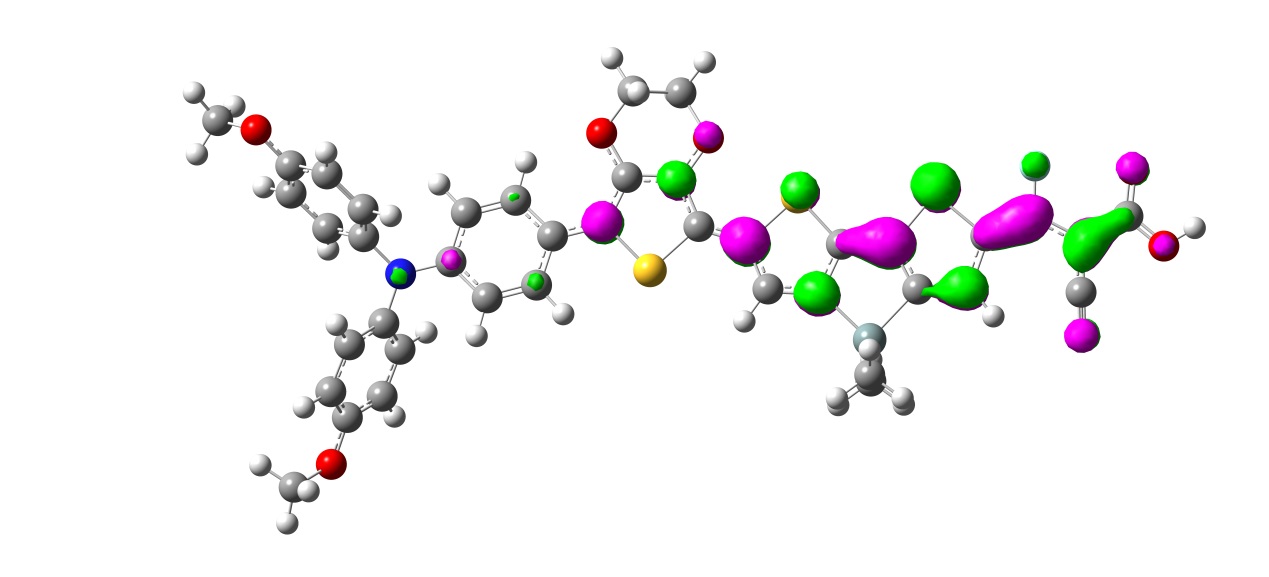


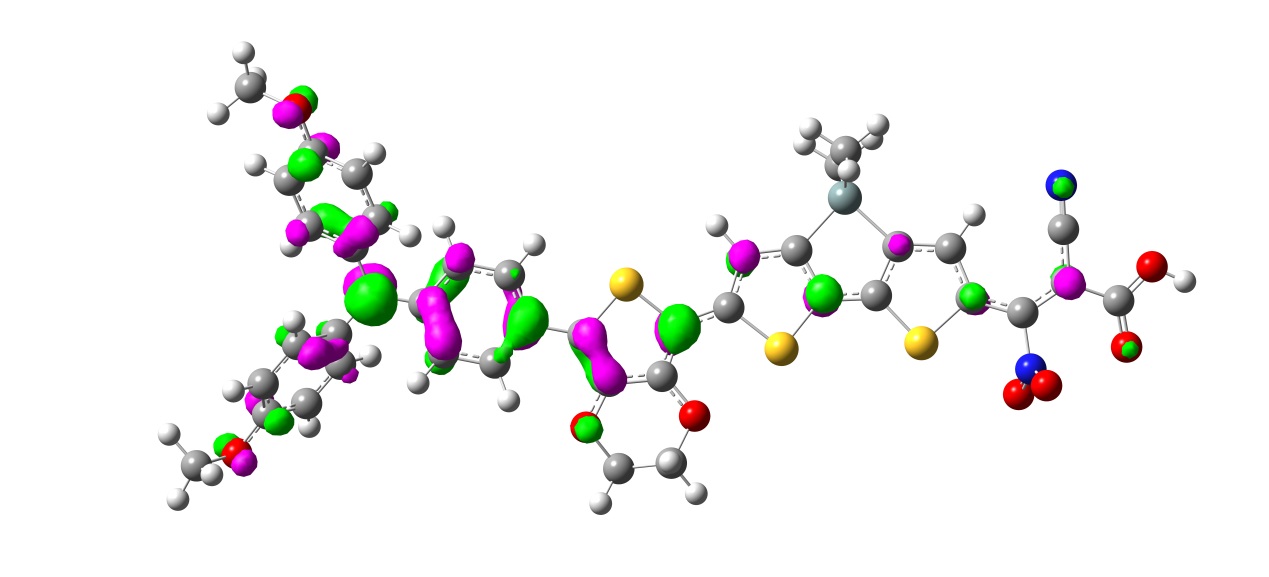

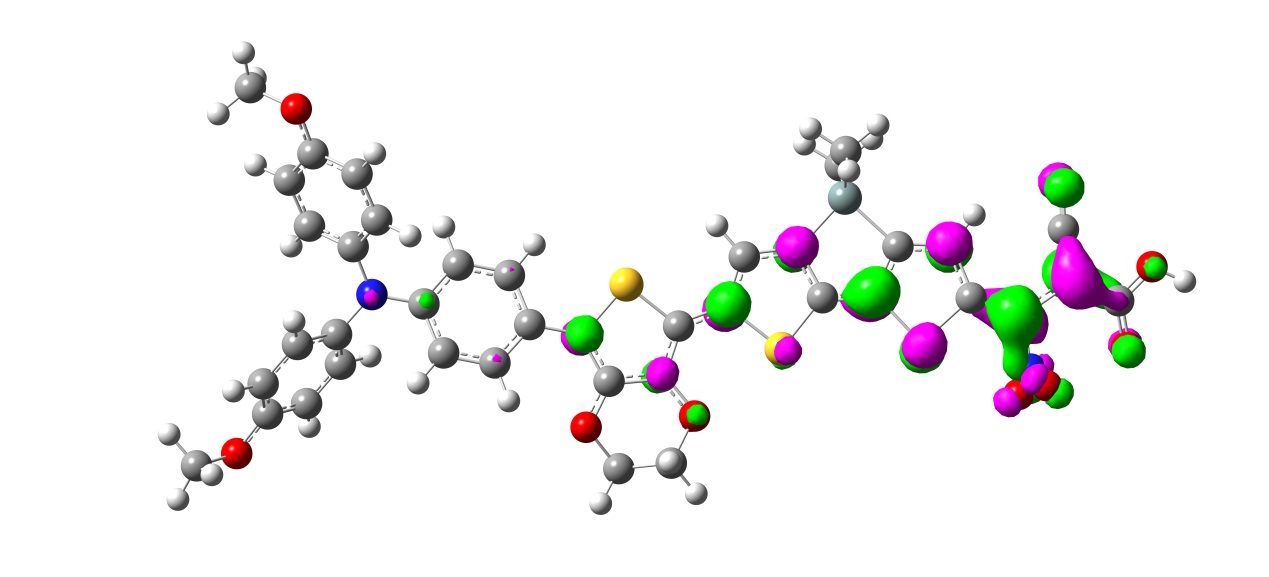


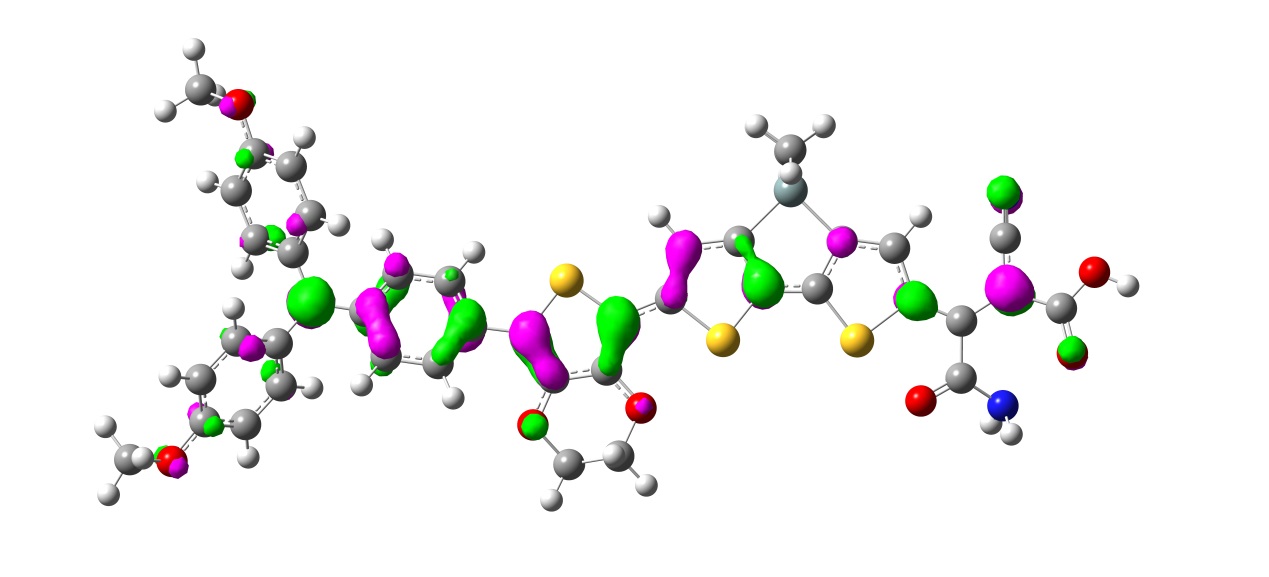

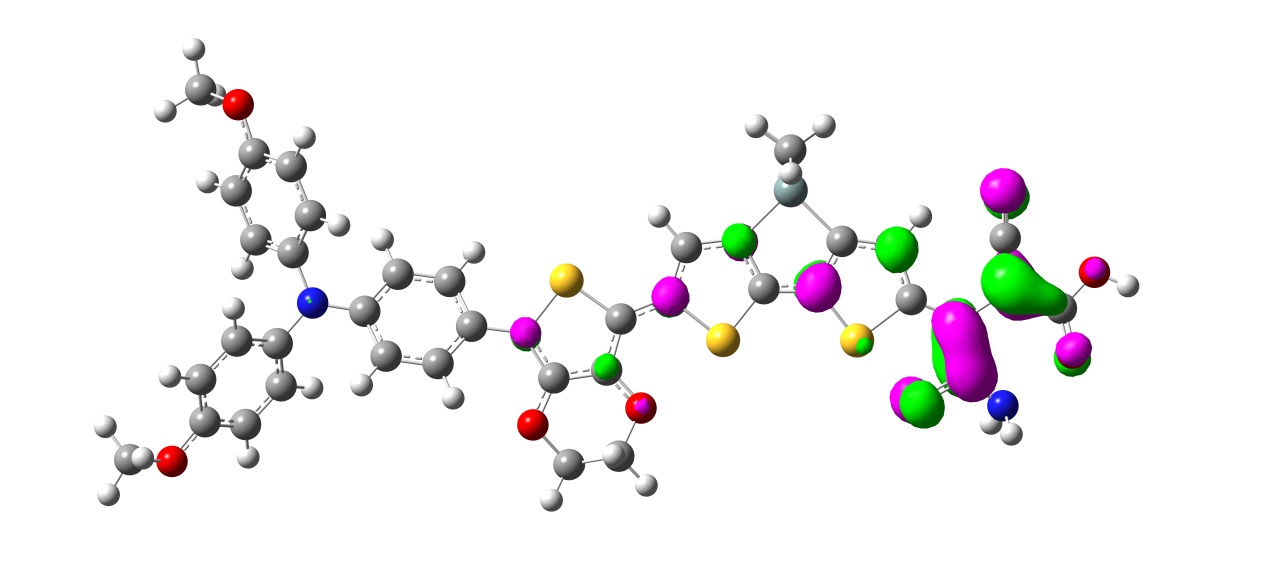


**Figure S4**


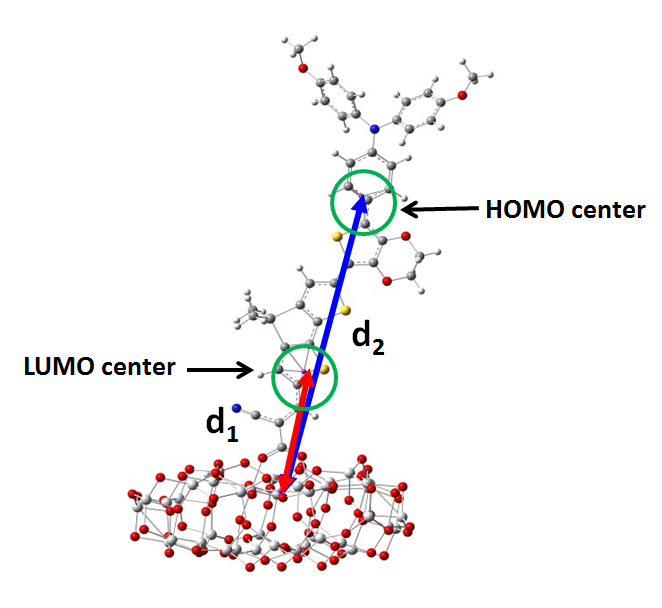


**Figure S5**

**Calculation details of the relevant parameters in Marcus model**

**1*. Driving forces of the electron injection*(**Δ*G*inj**) *and electron recombination* (**Δ*G*rec**)**

According to the previous study, in DSSCs the Δ*G* in the electron injection (Δ*G*inj) and electron recombination (Δ*G*rec) processes can be estimated with [1],

(S1)

(S2)

where *E*CB is the conduction band energy level of TiO2, *E**dye/*E*dye is the oxidation potential of excited/ground state, and *E*0-0 is the vertical transition energy.

**2. *Reorganization energy* (*λ*)**

As shown in Eq(8), the *λ* is the sumof structural relaxation from dye molecule (*λ*dye), semiconductor (*λ*sc), and organic solvent (*λ*sol) in the electron transfer process,

(S3)

Generally, the *λ*dye can be calculated with the classical adiabatic potential energy surface (PES) method [2]. According to the four-point model, the *λ*dye term in the electron injection (*λ*inj) and electron recombination (*λ*rec) processes can be obtained with [3]

(S4)

(S5)

where *E**(*g**)/*E**(*g*+) is the excited state energy with the excited state/cationic geometry, *E*+(*g**)/*E*+(*g*+) is the cationic energy with the excited state/cationic geometry, *E*0(*g*+)/*E*0(*g*0) is the neutral energy with the cationic/neutral geometry, *E*+(*g*0)/*E*+(*g*+) is the cationic energy with the cationic/neutral geometry. On basis of the study from Wei et al, the *λ*sc was set to 0.026eV [4]. Relatively, the *λ*sol term is still not easy to be calculated accurately. Here, the *λ*sol was approximately estimated with the modified Marcus scheme [5]. According to this model, the *λ*solis calculated by,

(S6)

(S7)

where/is the optical/static dielectric constant of solvent, which is 1.81/37.50 for acetonitrile, / is the optical/static (6.45/48.00) dielectric constant of TiO2, *r*A is the dye radius, and *d* is the distance between the TiO2 surface and the dye LUMO/HOMO center for the electron injection/recombination process.

**3. *Electron coupling* (*V*)**

According to the previous study, since the electron transfer in large π-conjugated systems has strong distance dependence, the *V* term can be calculated with [6],

(S8)

where *V*0 is the electron coupling without considering the distance dependence, *β* is the damped exponential, *d* is the separation distance from the dye LUMO/HOMO center to the TiO2 surface for the electron injection /recombination process. As seen in Figure S4, because the studied dyes’ HOMO is mainly localized in TPA, EDOT, and π-bridge units, while their LUMO is centered on the π-bridge and acceptor, we defined the centroid of TPA, EDOT, and π-bridge segments as the HOMO center. Similarly, the LUMO center was set to the centroid of the π-bridge and acceptor (Figure S5). According to the recent reports, the *β* was set to 0.5/1.0 for the electron injection/recombination process [7-8].

In this work, the *V*0 in Eq(S8) was calculated with the direct-coupling (DC) method [9-10], which can provide more accurate *V*0 value than the other methods, since it involves the orbital overlap correction. In terms of this method, the *V*0 can be estimated with [11],

(S9)

where *T*ij is the electron coupling without considering the orbital overlap correction, *S*ij is the spatial overlap integral, and *e*i/*e*j is the site energy. The *T*ij, *S*ij, and *e*i/*e*j can be calculated via *T*ij=<*ψ*i|*F*KS|*ψ*j>, *S*ij=<*ψ*i|*ψ*j>, and *e*i/*e*j=<*ψ*i/*ψ*j|*F*KS| *ψ*i/*ψ*j>. Among them, *ψ*i is the HOMO/LUMO of dye, *ψ*jis the LUMO of TiO2, and *F*KS is the Kohn-Sham matrix of dye/(TiO2)38 complex.

**References**

[1] J. Preat, C. Michaux, D. Jacquemin, and E.A. Perpete, J. Phys. Chem. C **113**, 16821 (2009). doi:10.1021/jp904946a.

[2] M. Malagoli and J.L. Bredas, Chem. Phys. Lett. **327**, 13 (2000). doi:10.1016/S0009-2614(00)00757-0.7.

[3] H.-Y. Chen and I. Chao, Chem. Phys. Lett. **401**, 539 (2005).doi:10.1016/j.cplett.2004.11.125.

[4] H. Wei, J.-W. Luo, S.-S. Li, and L.-W. Wang, J. Am. Chem. Soc.**138**, 8165 (2016). doi:10.1021/jacs.6b03524.

[5] E. Maggio, N. Martsinovich, and A. Troisi, J. Chem. Phys. **137**, 22A508 (2012). doi:10.1063/1.4737101.

[6] J.N. Clifford, E. Palomares, M.K. Nazeeruddin, M. Grätzel, J. Nelson, X. Li, N.J. Long, and J.R. Durrant, J. Am. Chem. Soc. **126**, 5225 (2004). doi:10.1021/ja039924n.

[7] T.J. Barr and G.J. Meyer, ACS Energy Lett. **2**, 2335 (2017). doi:10.1021/acsenergylett.7b00569.

[8] J.N. Clifford, E. Palomares, M.K. Nazeeruddin, M. Grätzel, J. Nelson, X. Li, N.J. Long, and J.R. Durrant, J. Am. Chem. Soc. 126, 5225 (2004). doi:10.1021/ja039924n.

[9] S. Yin, Y. Yi, Q. Li, G. Yu, Y. Liu and Z. Shuai, J. Phys. Chem. A **110**, 7138 (2006). doi:10.1021/jp057291o.

[10] A. Troisi and G. Orlandi, J. Phys. Chem. A **110**, 4065 (2006). doi:10.1021/jp055432g.

[11] S. Yin, L. Li, Y. Yang, and J.R. Reimers, J. Phys. Chem. C **116**, 14826 (2012). doi:10.1021/jp303724r.

1.  Corresponding author: Tel.: +86 916 2640660

   *E-mail address:* zhaocb@snut.edu.cn (C. Zhao), yuxiaohu950203@163.com (X. Yu), jinlx@snut.edu.cn (L. Jin). [↑](#footnote-ref-2)
2.  [↑](#footnote-ref-3)
